# Supplementary material for: Motor Point Stimulation in Spinal Paired Associative Stimulation can Facilitate Spinal Cord Excitability
Source: PubMed Central journal article supplement (PMC7729006; doi:10.3389/fnhum.2020.593806), 2020-11-27
Supplement: Data_Sheet_1.pdf [file Data_Sheet_1.pdf]

## 1 Appendix A – Group results for individual TMS stimulation intensity

For each intensity, the 5 peak-to-peak MEP amplitudes were averaged at each post-intervention assessment. The normality of the group data for each stimulation intensity and condition was tested using the Shapiro-Wilk test and was found to be non-normal. The log-transformation of this group data was found to be normal for each stimulation intensity and condition. Sphericity was tested using the Mauchly's test, and if sphericity could not be assumed a Greenhouse-Geisser correction was used. A two-way repeated measures ANOVA with Holm-Bonferroni correction as a post-hoc was performed to determine the effect of time (pre, post-0, post-10, post-20 and post-30) and condition (REAL, CONTROL) on the log transformed MEP amplitudes for the SOL muscle at each stimulation intensity for the group data. Post-hoc evaluations were done via paired t-tests between post-intervention assessments and the pre-intervention assessment for each condition and intensity.

The log transformed MEP amplitude for each stimulation intensity is shown in Figure A1 as the group results. For 100%RMT (Figure A1A), a two-way repeated measures ANOVA revealed a significant main effect of condition ( $F(1,7) = 9.204, p = 0.019, \eta^2 = 0.568$ ), a significant main effect of time ( $F(4, 28) = 3.409, p = 0.022, \eta^2 = 0.328$ ), but no significant interaction effect ( $F(4,28) = 0.956, p = 0.405, \eta^2 = 0.120$ ) were found. Paired t-tests with a Holm-Bonferroni correction revealed a significant increase from pre-intervention immediately post-intervention in the REAL condition, but no significant increases from pre-intervention were found at any other post-intervention assessments in the REAL or in the CONTROL condition. The test statistic summary is shown in Table A1.

The log transformed MEP amplitude for each stimulation intensity is shown in Figure A1 as the group results. For 100%RMT (Figure A1A), a two-way repeated measures ANOVA revealed a significant main effect of condition ( $F(1,7) = 38.380, p < 0.001, \eta^2 = 0.846$ ), no significant main effect of time ( $F(4, 28) = 1.805, p = 0.156, \eta^2 = 0.205$ ), and no significant interaction effect ( $F(1.537,10.762) = 3.681, p = 0.069, \eta^2 = 0.345$ ) were found. Paired t-tests with a Holm-Bonferroni correction revealed a significant increase from pre-intervention at Post-0 and Post-30 assessments in the REAL condition, but no significant increases from pre-intervention values were found at any other post-intervention assessments in the REAL or in the CONTROL condition. The test statistic summary is shown in Table A2.

The log transformed MEP amplitude for each stimulation intensity is shown in Figure A1 as the group results. For 100%RMT (Figure A1A), a two-way repeated measures ANOVA revealed a significant main effect of condition ( $F(1,7) = 17.091, p = 0.004, \eta^2 = 0.709$ ), a significant main effect of time ( $F(1.981, 12.868) = 4.905, p = 0.025, \eta^2 = 0.412$ ), and a significant interaction effect ( $F(4,28) = 2.932, p = 0.038, \eta^2 = 0.295$ ) were found. Paired t-tests with a Holm-Bonferroni correction revealed a significant increase from pre-intervention at all post-intervention

assessments in the REAL condition, but no significant increases from pre-intervention values were found in the CONTROL condition. The test statistic summary is shown in Table A3.

The log transformed MEP amplitude for each stimulation intensity is shown in Figure A1 as the group results. For 100%RMT (Figure A1A), a two-way repeated measures ANOVA revealed a significant main effect of condition ( $F(1,7) = 40.667, p < 0.001, \eta^2 = 0.853$ ), a significant main effect of time ( $F(4, 28) = 3.452, p = 0.021, \eta^2 = 0.330$ ), but no significant interaction effect ( $F(4,28) = 2.165, p = 0.099, \eta^2 = 0.236$ ) were found. Paired t-tests with a Holm-Bonferroni correction revealed a significant increase from pre-intervention at the Post-30 assessments in the REAL condition, but no significant increases from pre-intervention values were found at any other post-intervention assessments in the REAL or in the CONTROL condition. The test statistic summary is shown in Table A4.

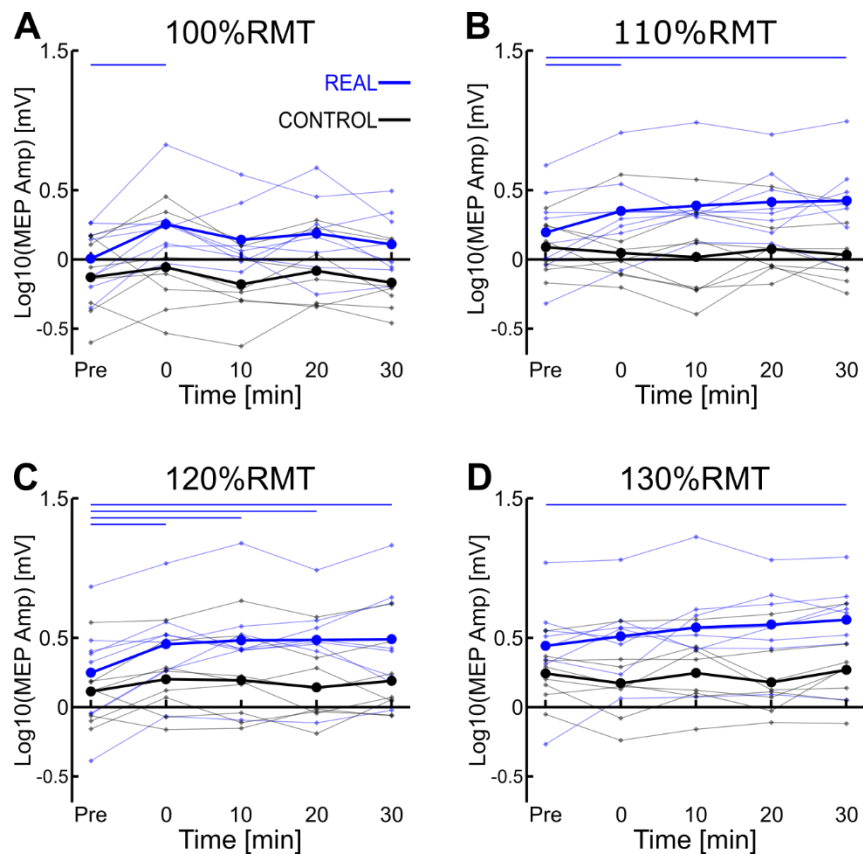

Figure A1 – Graphs show group data as thick lines for the REAL (blue) and CONTROL (grey) conditions when stimulated at 100%, 110%, 120%, and 130%RMT respectively,  $n = 8$ . Individual participants are shown as thin lines. Horizontal blue lines at the top of the graphs indicate a statistical difference from the pre-intervention MEP amplitude. (A) 100%RMT (B) 110%RMT (C) 120%RMT (D) 130%RMT.

Table A1 – Summary of the paired t-test statistics when comparing the post-intervention to pre-intervention assessment results for the log transformed SOL MEP amplitude in both REAL and CONTROL condition at 100%RMT.

| REAL                      | Post-0        | Post-10       | Post-20       | Post-30       |
|---------------------------|---------------|---------------|---------------|---------------|
| t(7)                      | 3.516         | 1.602         | 1.557         | 1.138         |
| P-value                   | 0.039         | 0.460         | 0.460         | 0.327         |
| Geometric Mean difference | 1.771         | 1.366         | 1.517         | 1.271         |
| 95% CI                    | 1.206 - 2.600 | 0.862 - 2.163 | 0.805 - 2.858 | 0.772 - 2.090 |
| Hedges' G                 | 0.919         | 0.517         | 0.631         | 0.399         |
| <b>CONTROL</b>            |               |               |               |               |
| t(7)                      | 0.793         | -0.603        | 0.564         | -0.707        |
| P-value                   | 1.000         | 1.000         | 1.000         | 1.000         |
| Geometric Mean difference | 1.181         | 0.892         | 1.113         | 0.915         |
| 95% CI                    | 0.718 - 1.943 | 0.570 - 1.396 | 0.710 - 1.746 | 0.679 - 1.232 |
| Hedges' G                 | 0.214         | 0.169         | 0.160         | 0.142         |

Table A2 – Summary of the paired t-test statistics when comparing the post-intervention to pre-intervention assessment results for the log transformed SOL MEP amplitude in both REAL and CONTROL condition at 110%RMT.

| REAL                      | Post-0        | Post-10       | Post-20       | Post-30       |
|---------------------------|---------------|---------------|---------------|---------------|
| t(7)                      | 3.732         | 2.534         | 2.031         | 6.207         |
| P-value                   | 0.022         | 0.078         | 0.082         | 0.002         |
| Geometric Mean difference | 1.425         | 1.561         | 1.653         | 1.693         |
| 95% CI                    | 1.139 - 1.784 | 1.030 - 2.366 | 0.921 - 2.967 | 1.385 - 2.069 |
| Hedges' G                 | 0.460         | 0.613         | 0.691         | 0.669         |
| <b>CONTROL</b>            |               |               |               |               |
| t(7)                      | -0.773        | -1.023        | -0.243        | -1.657        |
| P-value                   | 1.000         | 1.000         | 0.930         | 0.566         |
| Geometric Mean difference | 0.910         | 0.849         | 0.968         | 0.880         |

|           |               |               |               |               |
|-----------|---------------|---------------|---------------|---------------|
| 95% CI    | 0.683 - 1.214 | 0.582 - 1.240 | 0.708 - 1.324 | 0.734 - 1.056 |
| Hedges' G | 0.169         | 0.247         | 0.062         | 0.247         |

Table A3 – Summary of the paired t-test statistics when comparing the post-intervention to pre-intervention assessment results for the log transformed SOL MEP amplitude in both REAL and CONTROL condition at 120%RMT.

| REAL                      | Post-0        | Post-10       | Post-20       | Post-30       |
|---------------------------|---------------|---------------|---------------|---------------|
| t(7)                      | 5.017         | 3.163         | 4.245         | 5.124         |
| P-value                   | 0.005         | 0.016         | 0.008         | 0.005         |
| Geometric Mean difference | 1.605         | 1.712         | 1.727         | 1.743         |
| 95% CI                    | 1.284 - 2.006 | 1.145 - 2.558 | 1.274 - 2.341 | 1.349 - 2.253 |
| Hedges' G                 | 0.525         | 0.572         | 0.619         | 0.561         |
| CONTROL                   | Post-0        | Post-10       | Post-20       | Post-30       |
| t(7)                      | 1.435         | 1.355         | 0.378         | 1.801         |
| P-value                   | 0.583         | 0.583         | 0.716         | 0.459         |
| Geometric Mean difference | 1.225         | 1.204         | 1.068         | 1.191         |
| 95% CI                    | 0.877 - 1.713 | 0.871 - 1.663 | 0.708 - 1.611 | 0.947 - 1.497 |
| Hedges' G                 | 0.314         | 0.261         | 0.101         | 0.261         |

Table A4 – Summary of the paired t-test statistics when comparing the post-intervention to pre-intervention assessment results for the log transformed SOL MEP amplitude in both REAL and CONTROL condition at 130%RMT.

| REAL                      | Post-0        | Post-10       | Post-20       | Post-30       |
|---------------------------|---------------|---------------|---------------|---------------|
| t(7)                      | 1.095         | 2.656         | 2.469         | 4.059         |
| P-value                   | 0.310         | 0.098         | 0.098         | 0.019         |
| Geometric Mean difference | 1.170         | 1.353         | 1.422         | 1.542         |
| 95% CI                    | 0.834 - 1.640 | 1.034 - 1.771 | 1.015 - 1.992 | 1.198 - 1.985 |
| Hedges' G                 | 0.187         | 0.343         | 0.424         | 0.513         |

| CONTROL                      |               |               |               |               |
|------------------------------|---------------|---------------|---------------|---------------|
| t(7)                         | -1.768        | 0.053         | -1.521        | 0.488         |
| P-value                      | 0.482         | 1.000         | 0.516         | 1.000         |
| Geometric Mean<br>difference | 0.851         | 1.005         | 0.865         | 1.063         |
| 95% CI                       | 0.686 - 1.056 | 0.786 - 1.286 | 0.691 - 1.084 | 0.791 - 1.427 |
| Hedges' G                    | 0.285         | 0.010         | 0.262         | 0.107         |

## 2 Appendix B – Individual participant statistical test results for the MEP response curve area

Table B1 – Summary of the two-way repeated measures ANOVA on the log transformed SOL MEP response curve areas for each participant. Bolded values indicate  $p < 0.05$ .

| Participant |             | df    | F-value | p-value          | $\eta^2$ |
|-------------|-------------|-------|---------|------------------|----------|
| p1          | Condition   | 1     | 41.060  | <b>0.003</b>     | 0.911    |
|             | Time        | 4     | 26.999  | <b>&lt;0.001</b> | 0.871    |
|             | Interaction | 4     | 48.344  | <b>&lt;0.001</b> | 0.924    |
| p2          | Condition   | 1     | 29.615  | <b>0.006</b>     | 0.881    |
|             | Time        | 4     | 4.380   | <b>0.014</b>     | 0.523    |
|             | Interaction | 4     | 2.194   | 0.116            | 0.354    |
| p3          | Condition   | 1     | 487.393 | <b>&lt;0.001</b> | 0.992    |
|             | Time        | 4     | 15.096  | <b>&lt;0.001</b> | 0.791    |
|             | Interaction | 4     | 46.521  | <b>&lt;0.001</b> | 0.921    |
| p4          | Condition   | 1     | 52.097  | <b>0.002</b>     | 0.929    |
|             | Time        | 4     | 0.816   | 0.534            | 0.169    |
|             | Interaction | 4     | 1.726   | 0.194            | 0.301    |
| p5          | Condition   | 1     | 134.422 | <b>&lt;0.001</b> | 0.971    |
|             | Time        | 4     | 16.031  | <b>&lt;0.001</b> | 0.800    |
|             | Interaction | 1.207 | 1.398   | 0.304            | 0.259    |
| p6          | Condition   | 1     | 448.080 | <b>&lt;0.001</b> | 0.991    |
|             | Time        | 4     | 10.333  | <b>&lt;0.001</b> | 0.721    |
|             | Interaction | 4     | 3.693   | <b>0.026</b>     | 0.480    |
| p7          | Condition   | 1     | 388.095 | <b>&lt;0.001</b> | 0.988    |
|             | Time        | 1.354 | 5.383   | 0.059            | 0.574    |
|             | Interaction | 2.05  | 6.215   | <b>0.022</b>     | 0.608    |
| p9          | Condition   | 1     | 168.959 | <b>&lt;0.001</b> | 0.977    |
|             | Time        | 4     | 22.418  | <b>&lt;0.001</b> | 0.849    |
|             | Interaction | 4     | 11.410  | <b>&lt;0.001</b> | 0.740    |

Table B2 – Summary of the independent t-test p-values and effect size (Hedges' G) when comparing the post-intervention to pre-intervention assessment results for the log transformed SOL MEP response curve in both the REAL and CONTROL condition. Bolded values represent significant differences ( $p < 0.05$ ).

|                 | REAL             |           |                  |           |                  |           |                  |           |
|-----------------|------------------|-----------|------------------|-----------|------------------|-----------|------------------|-----------|
|                 | Post-0           |           | Post-10          |           | Post-20          |           | Post-30          |           |
|                 | p-value          | Hedges' G | p-value          | Hedges' G | p-value          | Hedges' G | p-value          | Hedges' G |
| p1 <sup>#</sup> | <b>&lt;0.001</b> | 5.473     | <b>&lt;0.001</b> | 7.958     | <b>&lt;0.001</b> | 4.743     | <b>&lt;0.001</b> | 4.856     |
| p2 <sup>#</sup> | 0.858            | 0.106     | 0.560            | 0.812     | 0.560            | 0.829     | 0.036            | 1.957     |

|                 |              |       |                  |       |              |       |                  |       |
|-----------------|--------------|-------|------------------|-------|--------------|-------|------------------|-------|
| p3 <sup>#</sup> | <b>0.018</b> | 1.962 | 0.084            | 1.200 | <b>0.005</b> | 2.787 | <b>&lt;0.001</b> | 4.440 |
| p4 <sup>#</sup> | 0.565        | 0.935 | 0.947            | 0.041 | 0.880        | 0.492 | 0.880            | 0.646 |
| p5 <sup>^</sup> | <b>0.029</b> | 1.699 | <b>&lt;0.001</b> | 4.484 | <b>0.014</b> | 2.247 | <b>0.015</b>     | 2.279 |
| p6 <sup>^</sup> | <b>0.003</b> | 2.853 | <b>0.001</b>     | 3.653 | <b>0.003</b> | 2.523 | <b>0.003</b>     | 2.758 |
| p7 <sup>^</sup> | 0.114        | 1.528 | 0.462            | 0.938 | 0.462        | 0.852 | 0.364            | 0.820 |
| p9 <sup>^</sup> | <b>0.003</b> | 2.554 | <b>0.003</b>     | 2.826 | <b>0.000</b> | 4.782 | <b>0.001</b>     | 3.482 |
| CONTROL         |              |       |                  |       |              |       |                  |       |
| p1 <sup>#</sup> | <b>0.006</b> | 2.635 | <b>0.005</b>     | 2.769 | 0.955        | 0.033 | 0.099            | 1.340 |
| p2 <sup>^</sup> | 0.082        | 1.317 | <b>0.045</b>     | 1.768 | 0.082        | 1.465 | <b>0.013</b>     | 2.554 |
| p3 <sup>^</sup> | <b>0.000</b> | 4.864 | <b>0.002</b>     | 2.936 | <b>0.001</b> | 3.604 | 0.108            | 1.057 |
| p4 <sup>#</sup> | 0.821        | 0.601 | 0.681            | 0.324 | <b>0.023</b> | 2.135 | 0.821            | 0.690 |
| p5 <sup>#</sup> | 0.183        | 1.262 | 0.183            | 1.146 | 0.163        | 1.135 | 0.113            | 1.697 |
| p6 <sup>#</sup> | 1.000        | 0.288 | 1.000            | 0.209 | 0.289        | 1.184 | 1.000            | 0.286 |
| p7 <sup>#</sup> | 0.154        | 1.342 | <b>0.011</b>     | 2.516 | 0.186        | 1.159 | 0.290            | 0.708 |
| p9 <sup>^</sup> | 0.084        | 1.530 | 0.975            | 0.019 | <b>0.035</b> | 2.093 | 0.084            | 1.593 |

<sup>^</sup> Indicates the participant received constant current stimulation via Digitimer. <sup>#</sup>Indicates the participant received constant voltage stimulation via Nihon-Kohoen.

Table B3 - Summary of the two-way repeated measures ANOVA on the log transformed TA MEP response curve areas for each participant. Bolded values indicate  $p < 0.05$ .

| Participant |             | df | F-value | p-value          | $\eta^2$ |
|-------------|-------------|----|---------|------------------|----------|
| p1          | Condition   | 1  | 4.464   | 0.102            | 0.527    |
|             | Time        | 4  | 8.865   | <b>0.001</b>     | 0.689    |
|             | Interaction | 4  | 1.687   | 0.202            | 0.297    |
| p3          | Condition   | 1  | 177.323 | <b>&lt;0.001</b> | 0.978    |
|             | Time        | 4  | 12.895  | <b>&lt;0.001</b> | 0.763    |
|             | Interaction | 4  | 2.067   | 0.133            | 0.341    |
| p4          | Condition   | 1  | 79.560  | <b>0.001</b>     | 0.952    |
|             | Time        | 4  | 6.712   | <b>0.002</b>     | 0.627    |
|             | Interaction | 4  | 4.196   | <b>0.016</b>     | 0.512    |
| p4          | Condition   | 1  | 138.879 | <b>&lt;0.001</b> | 0.972    |
|             | Time        | 4  | 1.807   | 0.177            | 0.311    |
|             | Interaction | 4  | 1.661   | 0.208            | 0.293    |
| p5          | Condition   | 1  | 9.721   | <b>0.036</b>     | 0.708    |
|             | Time        | 4  | 2.613   | 0.075            | 0.395    |
|             | Interaction | 4  | 6.435   | <b>0.003</b>     | 0.617    |
| p6          | Condition   | 1  | 10.707  | <b>0.031</b>     | 0.728    |
|             | Time        | 4  | 7.095   | <b>0.002</b>     | 0.639    |
|             | Interaction | 4  | 2.070   | 0.133            | 0.341    |
| p7          | Condition   | 1  | 98.611  | <b>0.001</b>     | 0.961    |
|             | Time        | 4  | 7.562   | <b>0.001</b>     | 0.654    |

|    |             |   |        |              |       |
|----|-------------|---|--------|--------------|-------|
|    | Interaction | 4 | 6.532  | <b>0.003</b> | 0.620 |
|    | Condition   | 1 | 71.994 | <b>0.001</b> | 0.947 |
| p9 | Time        | 4 | 5.885  | <b>0.004</b> | 0.595 |
|    | Interaction | 4 | 8.123  | <b>0.001</b> | 0.670 |

Table B4 – Summary of the independent t-test p-values and effect size (Hedges' G) when comparing the post-intervention to pre-intervention assessment results for the log transformed TA MEP response curve in both the REAL and CONTROL condition. Bolded values represent significant differences ( $p < 0.05$ ).

| REAL            |              | Post-0    |              | Post-10   |              | Post-20   |              | Post-30   |  |
|-----------------|--------------|-----------|--------------|-----------|--------------|-----------|--------------|-----------|--|
|                 | p-value      | Hedges' G | p-value      | Hedges' G | p-value      | Hedges' G | p-value      | Hedges' G |  |
| p1 <sup>#</sup> | 0.156        | 0.978     | <b>0.008</b> | 2.724     | <b>0.008</b> | 2.709     | 0.156        | 1.213     |  |
| p2 <sup>#</sup> | <b>0.010</b> | 2.420     | <b>0.001</b> | 3.754     | 0.330        | 0.931     | 0.330        | 0.747     |  |
| p3 <sup>#</sup> | <b>0.008</b> | 2.267     | <b>0.005</b> | 2.646     | <b>0.044</b> | 1.444     | <b>0.001</b> | 3.524     |  |
| p4 <sup>#</sup> | 0.458        | 0.549     | 0.458        | 0.758     | 0.278        | 1.101     | 0.056        | 1.791     |  |
| p5 <sup>^</sup> | 0.081        | 1.592     | <b>0.030</b> | 2.274     | 0.250        | 0.721     | <b>0.034</b> | 1.919     |  |
| p6 <sup>*</sup> | 0.187        | 1.144     | 0.116        | 1.490     | 0.283        | 0.660     | 0.051        | 1.822     |  |
| p7 <sup>*</sup> | 0.127        | 1.554     | 0.211        | 0.943     | 0.211        | 1.162     | 0.127        | 1.410     |  |
| p9 <sup>*</sup> | <b>0.008</b> | 2.707     | 0.104        | 1.141     | <b>0.008</b> | 2.915     | 0.104        | 1.304     |  |
| CONTROL         |              |           |              |           |              |           |              |           |  |
| p1 <sup>#</sup> | 0.563        | 0.935     | 1.000        | 0.519     | 0.822        | 0.281     | 1.000        | 0.604     |  |
| p2 <sup>^</sup> | <b>0.017</b> | 2.272     | <b>0.022</b> | 2.064     | 0.085        | 1.410     | 0.085        | 1.381     |  |
| p3 <sup>^</sup> | 0.346        | 1.014     | 0.753        | 0.564     | 0.753        | 0.213     | 0.137        | 1.467     |  |
| p4 <sup>#</sup> | 1.000        | 0.333     | 0.592        | 0.978     | 1.000        | 0.477     | 1.000        | 0.225     |  |
| p5 <sup>#</sup> | 1.000        | 0.068     | 1.000        | 0.420     | 0.223        | 1.285     | 0.223        | 1.327     |  |
| p6 <sup>#</sup> | 0.230        | 1.052     | 0.230        | 0.828     | <b>0.021</b> | 2.245     | 0.137        | 1.490     |  |
| p7 <sup>#</sup> | 0.935        | 0.049     | 0.663        | 0.662     | 0.061        | 1.959     | 0.122        | 1.576     |  |
| p9 <sup>^</sup> | 0.501        | 0.418     | 0.059        | 1.769     | 0.317        | 0.889     | 0.173        | 1.280     |  |

<sup>^</sup> Indicates the participant received constant current stimulation via Digitimer. <sup>#</sup> Indicates the participant received constant voltage stimulation via Nihon-Kohden.
